# Supplementary material for: Anti-Obesity and Anti-Hyperglycemic Effects of Cinnamaldehyde via altered Ghrelin Secretion and Functional impact on Food Intake and Gastric Emptying
Source: Springer Nature journal article supplement (doi:10.1038/srep07919), 2015-01-21
Supplement: 41598_2015_BFsrep07919_MOESM1_ESM.pdf [file 41598_2015_BFsrep07919_MOESM1_ESM.pdf]

**Anti-Obesity and Anti-Hyperglycemic Effects of Cinnamaldehyde via altered Ghrelin Secretion and Functional impact on Food Intake and Gastric Emptying.**

Susana Camacho <sup>1,2\*</sup>, Stephanie Michlig <sup>1\*</sup>, Carole de Senarclens-Bezençon <sup>1</sup>, Jenny Meylan <sup>1</sup>, Julie Meystre <sup>2</sup>, Maurizio Pezzoli<sup>2</sup>, Henry Markram <sup>2</sup>, Johannes le Coutre <sup>1,3</sup>

## Supplementary data

| taq man primers | genes            | tissue |     |     |        |
|-----------------|------------------|--------|-----|-----|--------|
| Mm00441473_m1   | GLUT1(Slc2a1)    | liver  | BAT | WAT | muscle |
| Mm00446229_m1   | GLUT2(Slc2a2)    | liver  |     |     |        |
| Mm00441483_m1   | GLUT3(Slc2a3)    |        |     | WAT |        |
| Mm01245502_m1   | GLUT4(Slc2a4)    |        | BAT | WAT | muscle |
| Mm00600311_m1   | GLUT5(Slc2a5)    |        |     | WAT | muscle |
| Mm00554217_m1   | GLUT6(Slc2a6)    |        |     |     |        |
| Mm00444634_m1   | GLUT8 (Slc2a8)   |        |     | WAT | muscle |
| Mm00455122_m1   | GLUT9(Slc2a9)    | liver  |     |     |        |
| Mm01249519_m1   | GLUT10(Slc2a10)  | liver  |     |     | muscle |
| Mm00619244_m1   | GLUT12(Slc2a12)  |        |     | WAT | muscle |
| Mm00446190_m1   | IL-6             | liver  |     | WAT | muscle |
| Mm01343606_m1   | adiponectin      |        |     | WAT |        |
| Mm00434759_m1   | leptin           |        |     | WAT |        |
| Mm01244861_m1   | UCP1             |        | BAT |     |        |
| Mm00627598_m1   | UCP2             |        | BAT |     |        |
| Mm00494077_m1   | UCP3             |        | BAT |     |        |
| Mm01135198_m1   | CD36             |        | BAT |     |        |
| Mm01211875_m1   | insulin receptor |        |     | WAT | muscle |
| Mm01173149_m1   | SGLT3(SLC54)     | liver  |     | WAT | muscle |
| Mm00490331_m1   | ACSL4            |        | BAT | WAT |        |
| Mm01231183_m1   | Cpt1a            |        | BAT | WAT |        |
| Mm00440939_m1   | Ppara            |        | BAT | WAT |        |

|               |         |       |     |     |        |
|---------------|---------|-------|-----|-----|--------|
| Mm01246831_m1 | Acox 1  |       | BAT | WAT |        |
| Mm00607939_s1 | b-actin | liver | BAT | WAT | muscle |
| Mm01352366_m1 | SDHA    | liver | BAT | WAT | muscle |
| Mm01227437_m1 | TRPA1   | liver | BAT | WAT | muscle |

**Supplementary table:** List of additional genes has been studied in the following tissues: Liver, Brown adipose tissue (BAT), White adipose tissue (WAT) and muscle.

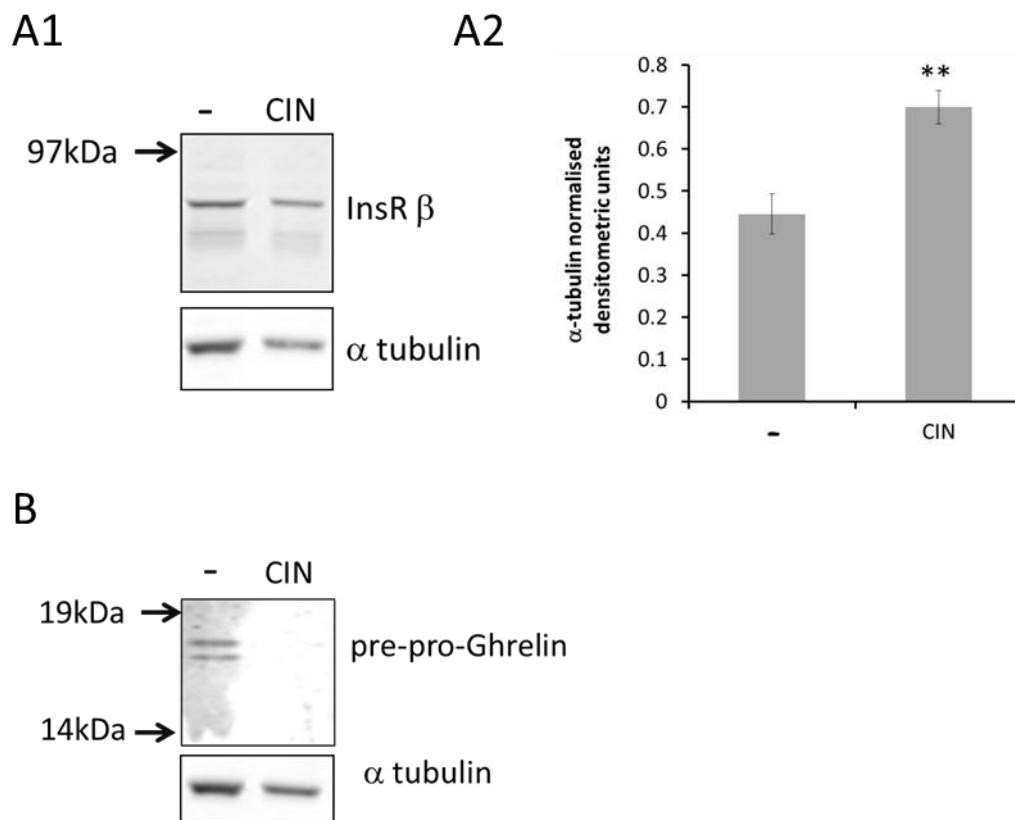

**Supplementary Figure 1:** Representative Western Blot (A1) of Insulin receptor  $\beta$  (InsR  $\beta$ ) and ghrelin (B) proteins expression in MGN 3-1 cells stimulated or not with cinnamaldehyde (CIN) for 24 hours. The corresponding  $\alpha$ -tubulin Western blots are represented underneath. Quantitative densitometric analysis of InsR  $\beta$  (A2) is performed by normalization with  $\alpha$ -tubulin. Quantification is represented as mean  $\pm$  SEM (\*\*:  $p < 0,01$ , Student t-test;  $n = 5$ )

## SUPPLEMENTARY METHODS

### *Western blot analysis:*

Cells were grown and stimulated with cinnamaldehyde as described in paragraph: ***“Ghrelin secretion in MGN3-1 cells: measurements in culture media and gene expression analysis”***. Cells were collected in NP40 cell Lysis Buffer (Invitrogen) supplemented with PMSF (Sigma-Aldrich) and protease inhibitor (P-2714; Sigma). The equivalent of 1/16 of the total lysate of each well (12 well plate) were resolved by SDS-PAGE and transferred on nitrocellulose membrane. Membranes were incubated overnight in primary antibodies, anti-Insulin receptor  $\beta$  (sc-711; Santa Cruz Biotechnology), anti-ghrelin (sc-10368; Santa Cruz Biotechnology) and anti-GOAT (H-032-12; Phoenix pharmaceuticals) diluted 1/200 in blocking buffer 0.1% Tween 20 (Invitrogen) or  $\alpha$ -tubulin (926-42213; LI-COR) diluted 1/10'000. Primary antibody detection was done using IRDye secondary antibodies (926-32411, 926-32210, 926-32211; LI-COR) diluted 1/10'000 in blocking buffer 0.1% Tween 20 and incubated during 1 hour. To perform quantification,  $\alpha$ -tubulin (926-42213; LI-COR) was detected on membranes stripped (stripping buffer from LI-COR) after the detection of each protein of interest. Detection of the signal was done using ODYSSEY classic Infrared Imaging System (LI-COR).
